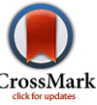

## Correction

# Correction: Crowdsourcing for Cognitive Science – The Utility of Smartphones

## The PLOS ONE Staff

There are errors in the author affiliations. The affiliations should appear as shown here:

Harriet R. Brown<sup>1,3</sup>, Peter Zeidman<sup>3</sup>, Peter Smittenaar<sup>3</sup>, Rick A. Adams<sup>3</sup>, Fiona McNab<sup>2,3</sup>, Robb B. Rutledge<sup>3</sup>, Raymond J. Dolan<sup>3</sup>

1 Oxford Centre for Human Brain Activity, University of Oxford, Oxford, United Kingdom, 2 School of Psychology, University of Birmingham, Birmingham, United Kingdom, 3 Wellcome Trust Centre for Neuroimaging, University College London, London, United Kingdom

## Reference

1. Brown HR, Zeidman P, Smittenaar P, Adams RA, McNab F, et al. (2014) Crowdsourcing for Cognitive Science – The Utility of Smartphones. PLoS ONE 9(7): e100662. doi:10.1371/journal.pone.0100662

---

**Citation:** The PLOS ONE Staff (2014) Correction: Crowdsourcing for Cognitive Science – The Utility of Smartphones. PLoS ONE 9(10): e111159. doi:10.1371/journal.pone.0111159

**Published:** October 14, 2014

**Copyright:** © 2014 The PLOS ONE Staff. This is an open-access article distributed under the terms of the Creative Commons Attribution License, which permits unrestricted use, distribution, and reproduction in any medium, provided the original author and source are credited.
